# Supplementary material for: Impact of SARS-CoV-2 vaccination on systemic immune responses in people living with HIV
Source: PubMed Central journal article supplement (PMC9755486; doi:10.3389/fimmu.2022.1049070), 2022-12-02
Supplement: DataSheet_1.pdf [file DataSheet_1.pdf]

## *Supplementary Material*

**Supplementary Table 1**

|                               | <b>Control</b> | <b>PLWH</b> |
|-------------------------------|----------------|-------------|
| <b>n</b>                      | 20             | 71          |
| <b>Age (Mean ± SD)</b>        | 39.4 ± 11.9    | 46.1 ± 10.9 |
| <b>Sex (F/M)</b>              | 12/8           | 9/62        |
| <b>HIV</b>                    | -              | +           |
| <b>Antiretroviral therapy</b> | -              | +           |

**Supplementary Table 2**

| <b>Specificity</b>    | <b>Clone</b> | <b>Fluorochrome</b> | <b>Dilution</b> | <b>RRID</b> |
|-----------------------|--------------|---------------------|-----------------|-------------|
| CD3                   | REA613       | APC                 | 1:50            | AB_2726238  |
| CD4                   | REA623       | VioBright B515      | 1:50            | AB_2726921  |
| CD8                   | REA734       | VioGreen            | 1:50            | AB_2659241  |
| CD14                  | REA599       | VioBlue             | 1:50            | AB_2655055  |
| CD20                  | REA780       | VioBlue             | 1:50            | AB_2656068  |
| CD137 (4-1BB)         | REA765       | PE-Vio 615          | 1:50            | AB_2654990  |
| CD154 (CD40L)         | REA238       | APC-Vio 770         | 1:50            | AB_2904741  |
| IFN- $\gamma$         | REA600       | PE                  | 1:50            | AB_2733717  |
| TNF- $\alpha$         | REA656       | PE-Vio 770          | 1:50            | AB_2905446  |
| Viability Fixable Dye | -            | 405/452             | 1:100           | -           |

**Supplementary Table 3**

| <b>Specificity</b> | <b>Clone</b> | <b>Fluorochrome</b>  | <b>Cat. number</b> | <b>Company</b> | <b>Dilution</b> | <b>RRID</b> |
|--------------------|--------------|----------------------|--------------------|----------------|-----------------|-------------|
| CD3                | UCHT1        | Brilliant Violet 510 | 300448             | Biolegend      | 1:100           | AB_2563468  |
| CD4                | OKT4         | PerCP-Cy5.5          | 344608             | Biolegend      | 1:500           | AB_1953236  |
| CD8                | RPA-T8       | APC- Fire 750        | 344746             | Biolegend      | 1:500           | AB_2572095  |
| CD19               | HIB19        | AlexaFluor 700       | 302225             | Biolegend      | 1:500           | AB_493750   |
| CD25               | BC96         | Brilliant Violet 421 | 302630             | Biolegend      | 1:200           | AB_11126749 |
| CD27               | O323         | Brilliant Violet 785 | 302831             | Biolegend      | 1:100           | AB_11219185 |
| CD45RA             | HI100        | PerCP                | 304155             | Biolegend      | 1:100           | AB_2616996  |
| CD95               | DX2          | Brilliant Violet 650 | 305642             | Biolegend      | 1:100           | AB_2632622  |
| CD107a             | H4A3         | Brilliant Violet 711 | 328639             | Biolegend      | 1:200           | AB_2565839  |
| CD127              | HIL-7R-M21   | BUV737               | 612794             | BD Biosciences | 1:20            | AB_2870121  |
| CD185 (CXCR5)      | J252D4       | AlexaFluor 488       | 356911             | Biolegend      | 1:100           | AB_2561893  |
| CD197 (CCR7)       | G043H7       | APC                  | 353213             | Biolegend      | 1:100           | AB_10915474 |
| CD279 (PD-1)       | EH12.2H7     | PE-Dazzle 594        | 329939             | Biolegend      | 1:20            | AB_2563658  |
| Foxp3              | 206D         | PE                   | 320107             | Biolegend      | 1:20            | AB_492987   |
| Ki-67              | Ki-67        | PE-Cy7               | 350525             | Biolegend      | 1:1000          | AB_2562871  |

**Supplementary Table 4** Immune response main values of donors with detectable anti-RBD titers at time point T0: Donor IDs 12 and 28. PVND50: pseudotype virus neutralization dose 50%. (S): SARS-CoV-2 Spike protein peptide pool. NA: Not available.

| Donor ID     | Time point | PVND50 WT | PVND50 Delta | PVND50 Omicron | anti-RBD (BAU/ml) | TNF <sup>+</sup> IFN <sup>+</sup> of CD4 <sup>+</sup> CD154 <sup>+</sup> (S) | TNF <sup>+</sup> IFN <sup>+</sup> of CD4 <sup>+</sup> CD154 <sup>+</sup> CD137 <sup>+</sup> (S) |
|--------------|------------|-----------|--------------|----------------|-------------------|------------------------------------------------------------------------------|-------------------------------------------------------------------------------------------------|
| 12           | T0         | NA        | NA           | NA             | 304.49            | 0                                                                            | 0                                                                                               |
| 28           | T0         | NA        | NA           | NA             | 59.99             | 0.53                                                                         | 3.1                                                                                             |
| Mean PLWH T0 |            |           |              |                | 5.69              | 2.92                                                                         | 11.79                                                                                           |
| Max PLHW T0  |            |           |              |                | 304.49            | 31.5                                                                         | 58.8                                                                                            |
|              |            |           |              |                |                   |                                                                              |                                                                                                 |
| 12           | T1         | NA        | NA           | NA             | 336.85            | 0                                                                            | 0                                                                                               |
| 28           | T1         | NA        | NA           | NA             | NA                | NA                                                                           | NA                                                                                              |
| Mean PLWH T1 |            |           |              |                | 183.08            | 5.62                                                                         | 15.41                                                                                           |
| Max PLHW T1  |            |           |              |                | 1364.98           | 27.45                                                                        | 45.9                                                                                            |
|              |            |           |              |                |                   |                                                                              |                                                                                                 |
| 12           | T2         | 53.41     | 20           | 0              | 2544.97           | 0                                                                            | 0                                                                                               |
| 28           | T2         | 62.27     | 115.5        | 23.31          | 277.51            | 3.14                                                                         | 12.95                                                                                           |
| Mean PLWH T2 |            | 92.47     | 68.72        | 46.81          | 1515.67           | 10.96                                                                        | 24.80                                                                                           |
| Max PLHW T2  |            | 495.3     | 836.2        | 699.9          | 9184.86           | 27.75                                                                        | 57.8                                                                                            |
|              |            |           |              |                |                   |                                                                              |                                                                                                 |
| 12           | T3         | NA        | NA           | NA             | 483.22            | 0.00%                                                                        | 0.00%                                                                                           |
| 28           | T3         | NA        | NA           | NA             | NA                | NA                                                                           | NA                                                                                              |
| Mean PLWH T3 |            |           |              |                | 266.47            | 12%                                                                          | 21%                                                                                             |
| Max PLHW T3  |            |           |              |                | 2127.65           | 43%                                                                          | 51%                                                                                             |
|              |            |           |              |                |                   |                                                                              |                                                                                                 |
| 12           | T4         | 1441      | 569.4        | 983.8          | 6782.11           | 6.00%                                                                        | 8.03%                                                                                           |
| 28           | T4         | NA        | NA           | NA             | NA                | NA                                                                           | NA                                                                                              |
| Mean PLWH T4 |            | 895.93    | 491.53       | 414.83         | 2463.27           | 16%                                                                          | 26%                                                                                             |
| Max PLHW T4  |            | 2560      | 2560         | 2560           | 14403.58          | 32%                                                                          | 54%                                                                                             |

## Supplementary Figures

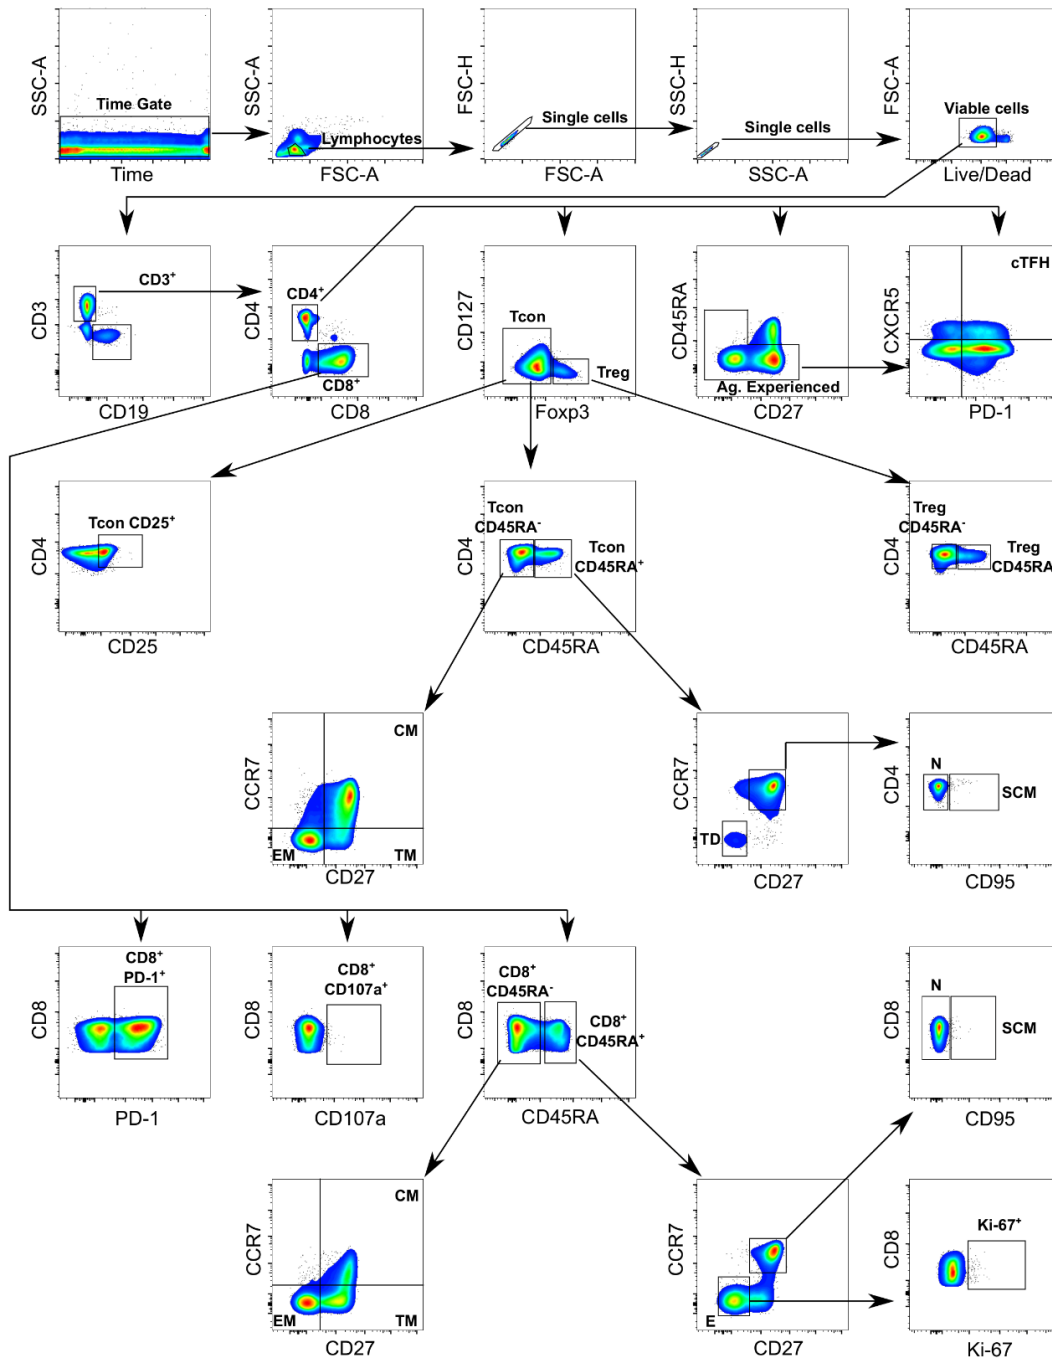

**Supplementary Figure 1** Gating strategy for analysis of T cell subsets via flow cytometry. Abbreviations used: cTFH (circulating follicular T helper cells), N (Naïve), SCM (Stem cell-like memory), CM (Central memory), TM (Transitional memory), EM (Effector memory), E (Effector), TD (Terminally differentiated).

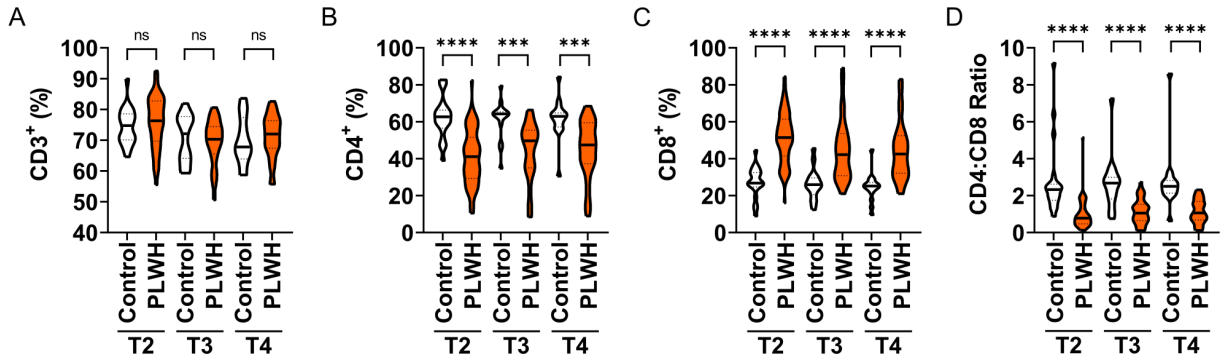

**Supplementary Figure 2** Frequency of lymphocyte lineages in vaccinated PLWH and HIV<sup>-</sup> controls. Frequencies of CD3<sup>+</sup> (**A**), CD4<sup>+</sup> (**B**), CD8<sup>+</sup> (**C**) cells at the indicated time point. (**D**) The CD4:CD8 ratio is plotted for the control and PLWH groups at the indicated time points. Statistical significance was calculated by two-tailed Mann-Whitney test: \*\*\* $p < 0.001$ , \*\*\*\* $p < 0.0001$ , ns= not significant (PLWH T2, n= 64; PLWH T3, n= 29; PLWH T4, n= 15; Control T2, n= 20; Control T3 and T4, n= 15).

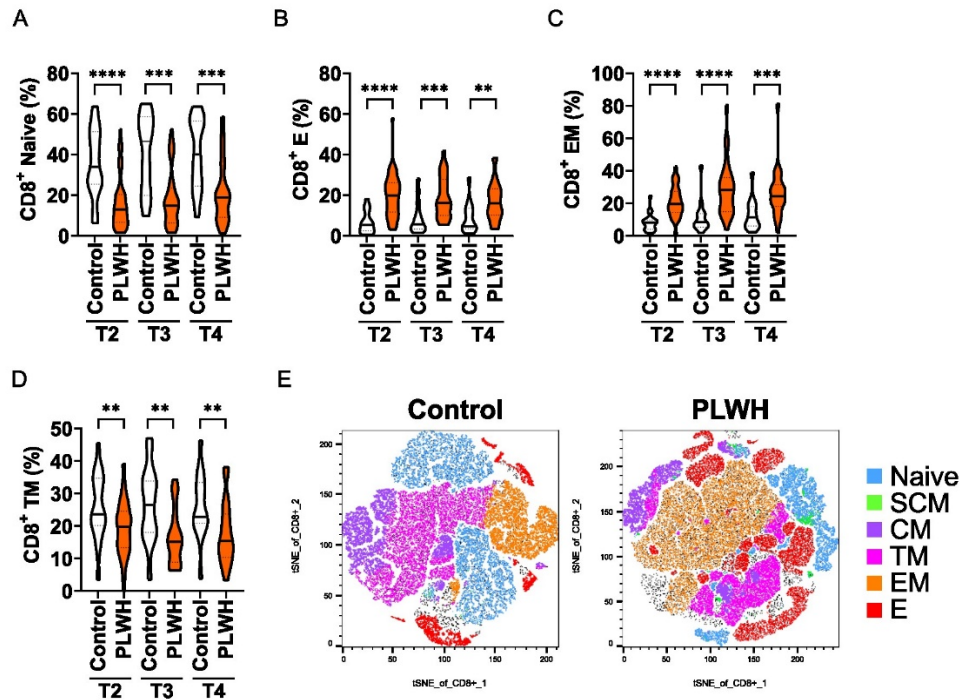

**Supplementary Figure 3** Phenotype and antigen-dependent responses of CD8<sup>+</sup> cytotoxic T cells in vaccinated PLWH and HIV-negative controls. Frequencies of Naïve (**A**), Effector (E) (**B**), Effector-Memory (EM) (**C**) and transitionally memory (TM) (**D**) CD8<sup>+</sup> cells at the indicated time points. (**E**) Representative t-SNE plots of the distribution of naïve, stem cell-like memory (SCM), central memory (CM), transitional memory (TM), effector memory (EM) and effector (E) CD8<sup>+</sup> T cells for control and PLWH groups. Statistical significance was calculated by two-tailed Mann-Whitney test: \*\* $p < 0.01$ , \*\*\* $p < 0.001$ , \*\*\*\* $p < 0.0001$  (PLWH T2,  $n = 64$ ; PLWH T3 & T4,  $n = 29$ ; Control T2,  $n = 20$ , Control T3 & T4,  $n = 15$ ).

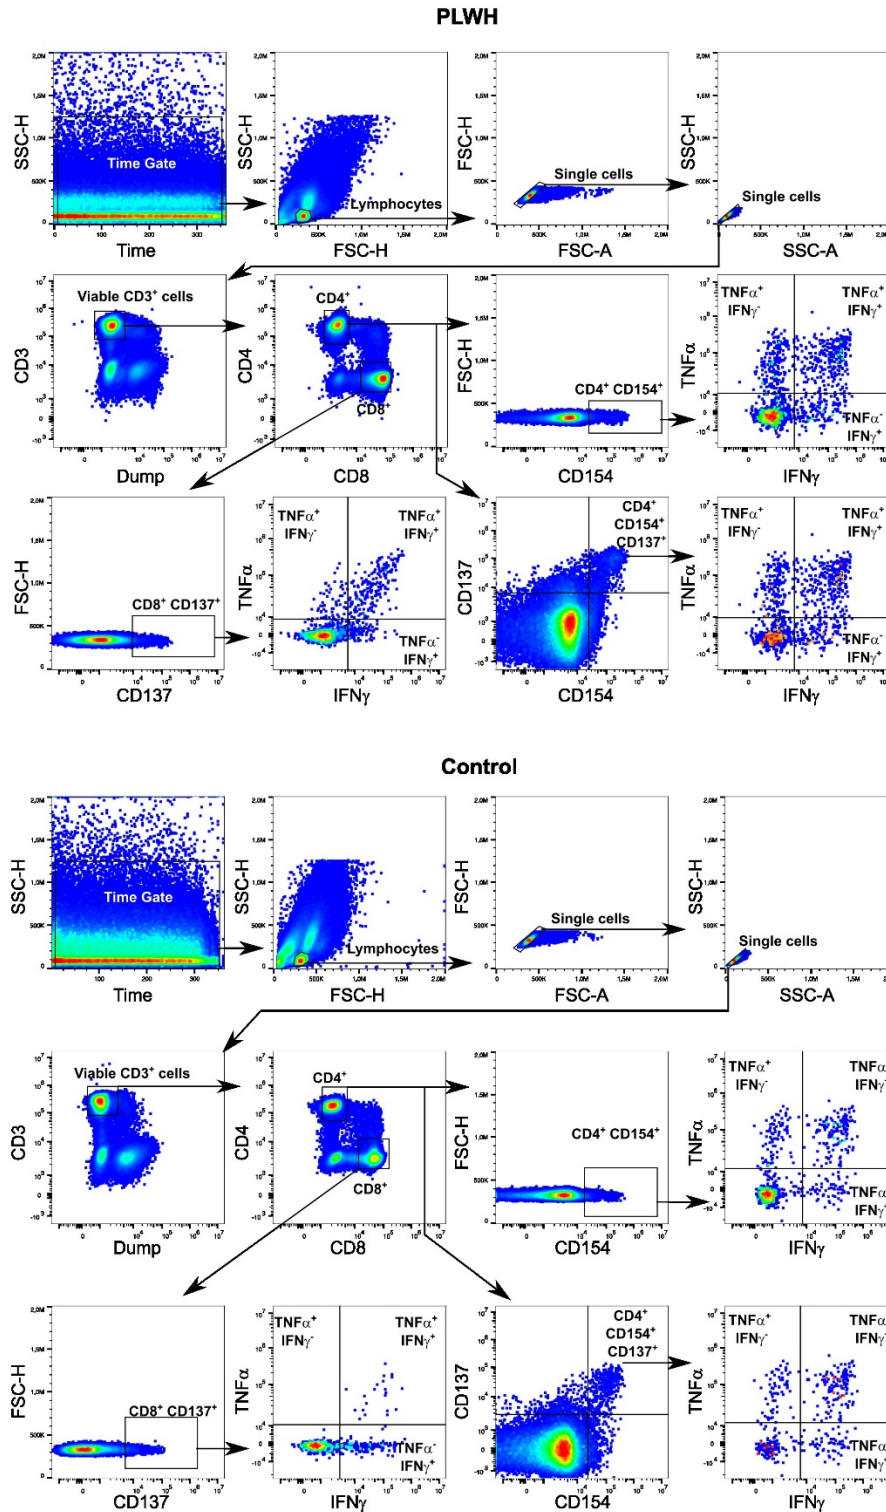

**Supplementary Figure 4** Gating strategy for analysis of antigen-specific T cells via flow cytometry. Representative dot plots for PLWH group (top) and Control group (bottom).

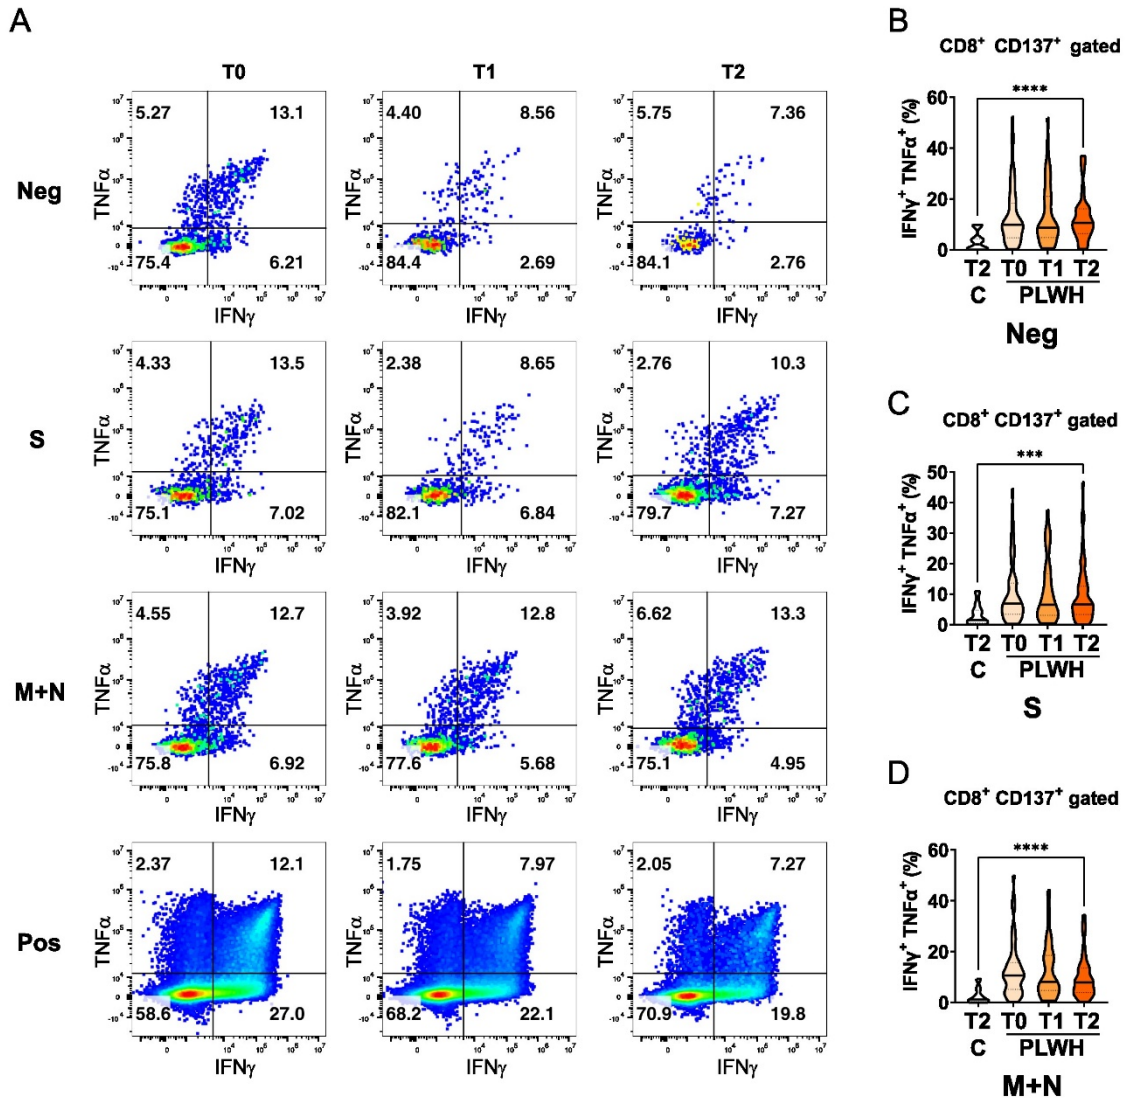

**Supplementary Figure 5** Cytokine responses of CD8<sup>+</sup> cells from PLWH. **(A)** Representative dot plots of TNFα and IFNγ expression in activated CD8<sup>+</sup> CD137<sup>+</sup> T cells of a PLWH donor stimulated with SARS-CoV-2 spike (S) glycoprotein peptide pool, or with membrane glycoprotein + nucleocapsid phosphoprotein (M+N) peptide pool, or with CytoStim™ (Pos), or left untreated (Neg) before and after vaccination shots. The violin plots represent **(B)** frequency of activated CD137<sup>+</sup> CD8<sup>+</sup> T cells that produce the inflammatory cytokines IFNγ and TNFα without any peptide stimulation (negative control) in controls and PLWH, **(C)** frequency of activated CD137<sup>+</sup> CD8<sup>+</sup> T cells that produce the inflammatory cytokines IFNγ and TNFα upon stimulation with SARS-CoV-2 spike protein-derived peptides (S) in controls and PLWH and **(D)** frequency of activated CD137<sup>+</sup> CD8<sup>+</sup> T cells that produce the inflammatory cytokines IFNγ and TNFα upon stimulation with peptides derived from SARS-CoV-2 membrane and nucleocapsid proteins that are conserved between different corona viruses (M+N) in controls and PLWH. Statistical significance was calculated by two-tailed Mann-Whitney test: \*\*\*p < 0.001, \*\*\*\*p < 0.0001 (PLWH T0, n = 64-65; PLWH T1, n = 54; PLWH T2, n = 59-61; Control T2, n = 20).

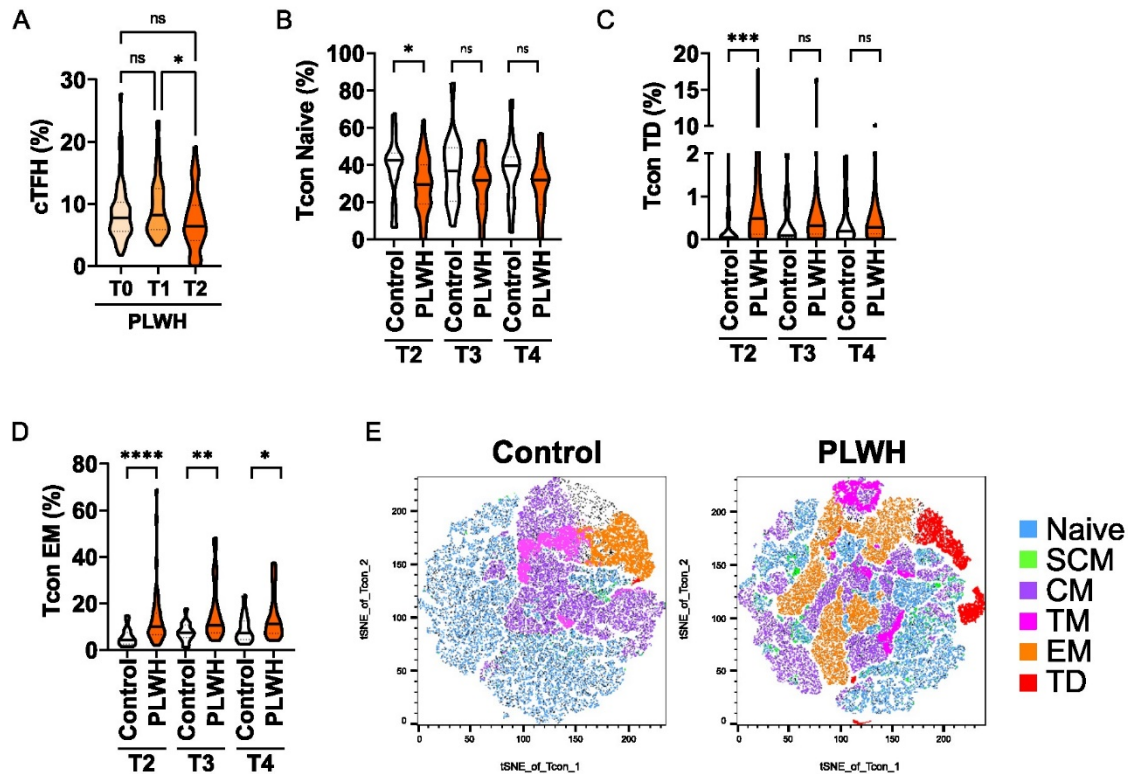

**Supplementary Figure 6** Immune phenotyping of CD4<sup>+</sup> helper T cells in vaccinated PLWH and HIV-negative controls. **(A)** Frequency of circulating follicular CD4<sup>+</sup> T helper cells in PLWH before the first vaccination (T0), before the second vaccination (T1) and 4 to 6 weeks after the second vaccination (T2). Frequencies of Naïve **(B)**, Terminally differentiated (TD) **(C)** and Effector-Memory (EM) **(D)** conventional CD4<sup>+</sup> T cells at the indicated time points. **(E)** Representative t-SNE plots of the distribution of naïve, stem cell-like memory (SCM), central memory (CM), transitional memory (TM), effector memory (EM) and terminally differentiated (TD) CD4<sup>+</sup> T cells for control and PLWH groups. Statistical significance was calculated by Kruskal-Wallis test and Dunn's test for multiple comparisons (A) or two-tailed Mann-Whitney test (B-D): \* $p < 0.05$ , \*\* $p < 0.01$ , \*\*\* $p < 0.001$ , \*\*\*\* $p < 0.0001$ , ns = not significant (PLWH T0,  $n = 65$ ; PLWH T1,  $n = 54$ ; PLWH T2,  $n = 64$ ; PLWH T3 & T4,  $n = 29$ ; Control T2,  $n = 20$ , Control T3 & T4,  $n = 15$ ).



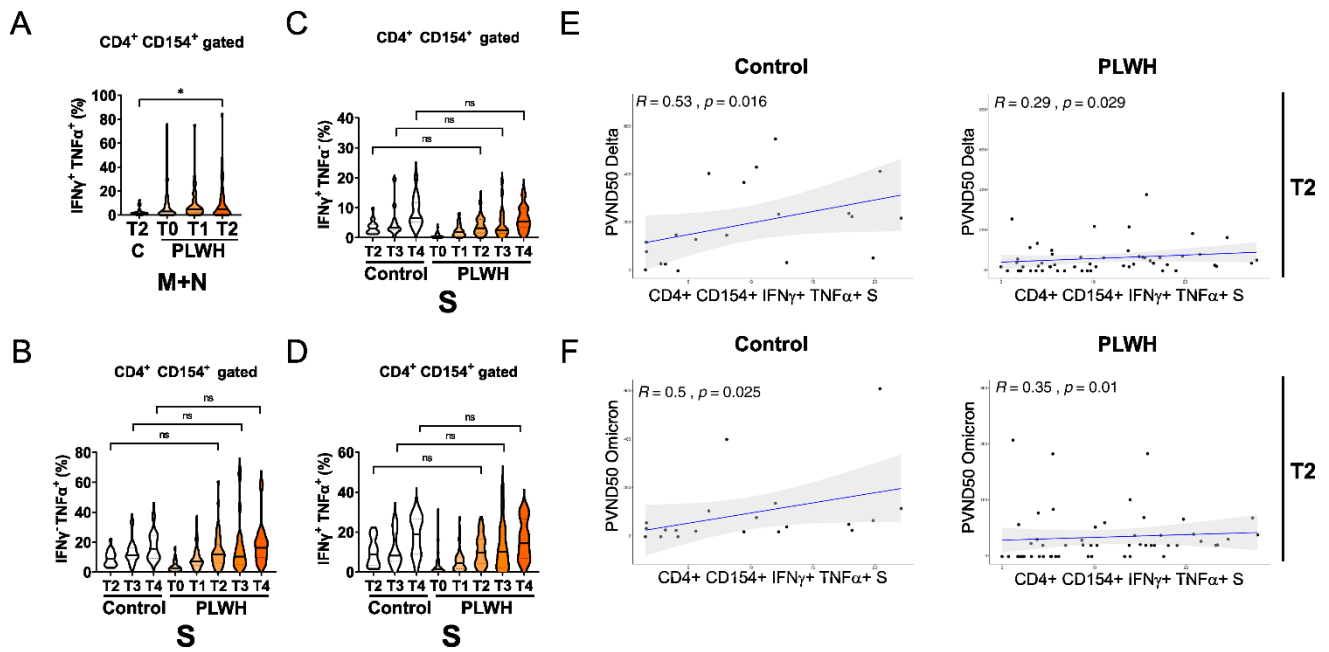

**Supplementary Figure 7** Antigen-specific responses of CD4<sup>+</sup> helper T cells. **(A)** Frequency of activated, i.e. CD154<sup>+</sup>, CD4<sup>+</sup> T cells that produce the inflammatory cytokines IFN $\gamma$  and TNF $\alpha$  upon stimulation with peptides derived from SARS-CoV-2 membrane and nucleocapsid proteins that are conserved between different corona viruses (M+N) in controls and PLWH. **(B)** Frequency of activated CD4<sup>+</sup> T cells expressing CD154 that produce the inflammatory cytokine TNF $\alpha$  upon stimulation with SARS-CoV-2 spike protein-derived peptides (S) in controls and PLWH at the indicated time points. **(C)** Frequency of activated CD4<sup>+</sup> T cells expressing CD154 that produce the inflammatory cytokine IFN $\gamma$  upon stimulation with SARS-CoV-2 spike protein-derived peptides (S) in controls and PLWH at the indicated time points. **(D)** Frequency of activated CD4<sup>+</sup> T cells expressing CD154 that produce the inflammatory cytokines IFN $\gamma$  and TNF $\alpha$  upon stimulation with SARS-CoV-2 spike protein-derived peptides (S) in controls and PLWH at the indicated time points. Statistical significance was calculated by two-tailed Mann-Whitney test: \* $p < 0.05$ , ns = not significant. (PLWH T0, n= 64-65; PLWH T1, n= 54; PLWH T2, n= 59-61; PLWH T3 & T4, n= 29; Control T2, n= 20; Control T3 & T4, n= 15). **(E-F)** The spearman's correlation between CD4<sup>+</sup> CD154<sup>+</sup> IFN $\gamma$ <sup>+</sup> TNF $\alpha$ <sup>+</sup> T cells and neutralizing titers against delta (upper) and omicron (lower) variants of SARS-CoV-2 are represented in the scatter plot for healthy participants (left side) and PLWH cohort (right side). R stands for correlation coefficient and p stands for p-value of statistical significance.
